# Supplementary material for: A simultaneous detection method for eight iodinated, brominated, and chlorinated haloacetic acid disinfection byproducts in human urine: liquid–liquid extraction-acidified methanol derivatization-gas chromatography
Source: Royal Society of Chemistry journal article supplement (doi:10.1039/d4ay02254h), 2025-01-01
Supplement: d4ay02254h1.pdf [file d4ay02254h1.pdf]

## Supplementary Information

for

### **A simultaneous detection method for eight iodinated, brominated, and chlorinated haloacetic acid disinfection byproducts in human urine: liquid-liquid extraction-acidified methanol derivatization-gas chromatography**

Xue Bai <sup>a,†</sup>, Lanxia Liu <sup>b,†</sup>, Jiefeng Qian <sup>b,†</sup>, Rui Liu <sup>a,†</sup>, Zhiyuan Du <sup>a</sup>, Rong Ni<sup>b,\*</sup>, Tian Chen<sup>c,\*</sup>, Weiwei Zheng <sup>a,d,e\*\*</sup>

<sup>a</sup>:Address Key Laboratory of the Public Health Safety, Ministry of Education, Department of Environmental Health, School of Public Health, Fudan University, Shanghai 200032, PR China

<sup>b</sup>:Xuhui Center for Disease Control and Prevention, Shanghai 200237, PR China

<sup>c</sup>:Shanghai Municipal Center for Disease Control and Prevention, Shanghai 200336, PR China

<sup>d</sup>:Center for Water and Health, School of Public Health, Fudan University, Shanghai 200032, PR China

<sup>e</sup>:Institute of Photochemistry and Photofunctional Materials, University of Shanghai for Science and Technology, Shanghai 200093, China.

\* Corresponding authors.

\*\* Correspondence to: W. Zheng, Center for Water and Health, School of Public Health, Fudan University, Shanghai 200032, China; Institute of Photochemistry and Photofunctional Materials, University of Shanghai for Science and Technology, Shanghai 200093, China.

Email address: nirong0823@sina.com (R. Ni), chentian@scdc.sh.cn (T. Chen), weiweizheng@fudan.edu.cn (W. Zheng).

† These authors contribute equally to this article.

**Table S1: Effect of sulfuric acid volume on the response strength of HAAs. The concentration of HAAs was 20 µg/L (mean ± SD, n = 3)**

| HAA  | sulfuric acid (mL) | area(mean,n=3) | area(sd) | area (%) |
|------|--------------------|----------------|----------|----------|
| CAA  | 0                  | 376.19         | 7.52     | 92.38    |
| CAA  | 0.25               | 390.52         | 6.27     | 95.90    |
| CAA  | 0.5                | 403.65         | 3.26     | 99.12    |
| CAA  | 0.75               | 390.84         | 9.37     | 95.98    |
| CAA  | 1                  | 407.35         | 11.13    | 100.03   |
| CAA  | 1.25               | 407.22         | 4.46     | 100.00   |
| CAA  | 1.5                | 403.69         | 4.52     | 99.13    |
| BAA  | 0                  | 4378.72        | 7.84     | 84.13    |
| BAA  | 0.25               | 4780.19        | 5.14     | 91.85    |
| BAA  | 0.5                | 4968.41        | 3.10     | 95.46    |
| BAA  | 0.75               | 4853.60        | 9.51     | 93.26    |
| BAA  | 1                  | 5096.47        | 10.42    | 97.92    |
| BAA  | 1.25               | 5204.55        | 6.22     | 100.00   |
| BAA  | 1.5                | 4955.75        | 2.67     | 95.22    |
| DCAA | 0                  | 2955.27        | 5.71     | 84.13    |
| DCAA | 0.25               | 3226.23        | 5.75     | 91.85    |
| DCAA | 0.5                | 3353.27        | 5.65     | 95.46    |
| DCAA | 0.75               | 3275.78        | 11.92    | 93.26    |
| DCAA | 1                  | 3439.69        | 4.22     | 97.92    |
| DCAA | 1.25               | 3512.64        | 2.17     | 100.00   |
| DCAA | 1.5                | 3344.72        | 12.93    | 95.22    |
| TCAA | 0                  | 2426.11        | 3.52     | 18.14    |
| TCAA | 0.25               | 9760.78        | 2.23     | 73.00    |
| TCAA | 0.5                | 11524.70       | 11.79    | 86.19    |
| TCAA | 0.75               | 12310.60       | 10.28    | 92.07    |
| TCAA | 1                  | 12959.80       | 8.19     | 96.93    |
| TCAA | 1.25               | 13370.70       | 12.96    | 100.00   |

---

|       |      |          |       |        |
|-------|------|----------|-------|--------|
| TCAA  | 1.5  | 12612.30 | 6.97  | 94.33  |
| IAA   | 0    | 893.46   | 5.56  | 6.87   |
| IAA   | 0.25 | 10586.30 | 3.33  | 81.37  |
| IAA   | 0.5  | 11563.10 | 4.90  | 88.88  |
| IAA   | 0.75 | 11516.70 | 11.95 | 88.52  |
| IAA   | 1    | 12469.00 | 5.96  | 95.84  |
| IAA   | 1.25 | 13009.60 | 8.26  | 100.00 |
| IAA   | 1.5  | 12560.10 | 9.30  | 96.54  |
| BCAA  | 0    | 10068.00 | 6.12  | 58.73  |
| BCAA  | 0.25 | 13724.50 | 6.34  | 80.06  |
| BCAA  | 0.5  | 15583.20 | 5.63  | 90.91  |
| BCAA  | 0.75 | 15763.40 | 4.30  | 91.96  |
| BCAA  | 1    | 16418.60 | 3.90  | 95.78  |
| BCAA  | 1.25 | 17141.90 | 9.70  | 100.00 |
| BCAA  | 1.5  | 19996.40 | 2.35  | 116.65 |
| DCBAA | 0    | 500.95   | 3.11  | 23.23  |
| DCBAA | 0.25 | 1366.11  | 6.93  | 63.36  |
| DCBAA | 0.5  | 1655.16  | 3.73  | 76.76  |
| DCBAA | 0.75 | 1866.24  | 6.02  | 86.55  |
| DCBAA | 1    | 1992.51  | 7.39  | 92.41  |
| DCBAA | 1.25 | 2156.25  | 5.51  | 100.00 |
| DCBAA | 1.5  | 2000.00  | 5.41  | 92.75  |
| DBAA  | 0    | 8056.66  | 3.81  | 49.06  |
| DBAA  | 0.25 | 11845.80 | 5.09  | 72.14  |
| DBAA  | 0.5  | 14137.30 | 9.74  | 86.10  |
| DBAA  | 0.75 | 14478.00 | 9.40  | 88.17  |
| DBAA  | 1    | 15628.00 | 2.50  | 95.17  |
| DBAA  | 1.25 | 16420.40 | 4.71  | 100.00 |
| DBAA  | 1.5  | 16567.60 | 2.74  | 100.90 |

---

**Table S2: Effect of anhydrous sodium sulfate added on the response strength of HAAs. The concentration of HAAs was 20 µg/L (mean ± SD, n = 3)**

| HAA  | anhydrous sodium sulfate(g) | area(mean,n=3) | area(sd) | area(%) |
|------|-----------------------------|----------------|----------|---------|
| CAA  | 0                           | 408.14         | 4.50     | 80.40   |
| CAA  | 1                           | 428.78         | 2.66     | 84.46   |
| CAA  | 2                           | 447.89         | 9.39     | 88.23   |
| CAA  | 3                           | 472.24         | 9.83     | 93.02   |
| CAA  | 4                           | 507.65         | 2.67     | 100.00  |
| CAA  | 5                           | 484.81         | 6.61     | 95.50   |
| CAA  | 6                           | 495.65         | 6.21     | 97.64   |
| BAA  | 0                           | 5248.38        | 6.55     | 82.82   |
| BAA  | 1                           | 5576.47        | 5.02     | 88.00   |
| BAA  | 2                           | 5703.35        | 7.57     | 90.00   |
| BAA  | 3                           | 5913.23        | 10.10    | 93.31   |
| BAA  | 4                           | 6336.89        | 6.08     | 100.00  |
| BAA  | 5                           | 6051.21        | 10.86    | 95.49   |
| BAA  | 6                           | 6141.79        | 3.33     | 96.92   |
| DCAA | 0                           | 4862.92        | 3.26     | 129.48  |
| DCAA | 1                           | 4251.38        | 8.55     | 113.19  |
| DCAA | 2                           | 4000.67        | 4.30     | 106.52  |
| DCAA | 3                           | 3713.92        | 6.04     | 98.88   |
| DCAA | 4                           | 3755.82        | 7.28     | 100.00  |
| DCAA | 5                           | 3355.58        | 3.51     | 89.34   |
| DCAA | 6                           | 3386.27        | 6.59     | 90.16   |
| TCAA | 0                           | 13421.90       | 7.40     | 89.13   |
| TCAA | 1                           | 13589.90       | 6.10     | 90.24   |
| TCAA | 2                           | 13607.10       | 5.41     | 90.36   |
| TCAA | 3                           | 13926.20       | 7.67     | 92.48   |
| TCAA | 4                           | 15059.40       | 10.21    | 100.00  |
| TCAA | 5                           | 14401.80       | 8.59     | 95.63   |

|       |   |          |       |        |
|-------|---|----------|-------|--------|
| TCAA  | 6 | 14832.60 | 6.07  | 98.49  |
| IAA   | 0 | 13117.40 | 4.30  | 85.30  |
| IAA   | 1 | 13747.50 | 5.88  | 89.40  |
| IAA   | 2 | 13802.00 | 10.47 | 89.75  |
| IAA   | 3 | 14293.10 | 9.58  | 92.95  |
| IAA   | 4 | 15377.70 | 8.30  | 100.00 |
| IAA   | 5 | 14754.30 | 2.68  | 95.95  |
| IAA   | 6 | 14994.90 | 9.62  | 97.51  |
| BCAA  | 0 | 20144.00 | 2.85  | 106.00 |
| BCAA  | 1 | 17775.80 | 3.11  | 93.54  |
| BCAA  | 2 | 17605.10 | 9.03  | 92.64  |
| BCAA  | 3 | 18122.10 | 9.25  | 95.36  |
| BCAA  | 4 | 19004.30 | 9.79  | 100.00 |
| BCAA  | 5 | 18010.50 | 2.56  | 94.77  |
| BCAA  | 6 | 18414.40 | 7.34  | 96.90  |
| DCBAA | 0 | 853.16   | 2.14  | 34.62  |
| DCBAA | 1 | 1945.48  | 5.63  | 78.94  |
| DCBAA | 2 | 2025.43  | 9.12  | 82.18  |
| DCBAA | 3 | 2152.17  | 9.70  | 87.33  |
| DCBAA | 4 | 2464.55  | 4.26  | 100.00 |
| DCBAA | 5 | 2438.78  | 2.17  | 98.95  |
| DCBAA | 6 | 2522.82  | 3.67  | 102.36 |
| DBAA  | 0 | 17607.30 | 9.20  | 96.26  |
| DBAA  | 1 | 16908.00 | 7.29  | 92.43  |
| DBAA  | 2 | 16743.40 | 8.05  | 91.53  |
| DBAA  | 3 | 17086.30 | 2.08  | 93.41  |
| DBAA  | 4 | 18292.00 | 6.36  | 100.00 |
| DBAA  | 5 | 17205.60 | 9.53  | 94.06  |
| DBAA  | 6 | 17655.70 | 9.56  | 96.52  |

---

**Table S3: Effect of A/M on the response strength of HAAs. The concentration of HAAs was 20 µg/L (mean ± SD, n = 3)**

| HAA  | A/M | area(mean,n=3) | area(sd) | area(%) |
|------|-----|----------------|----------|---------|
| CAA  | 1   | 864.15         | 5.92     | 100.00  |
| CAA  | 1.5 | 787.47         | 3.44     | 91.13   |
| CAA  | 2   | 776.79         | 2.90     | 89.89   |
| CAA  | 2.5 | 891.44         | 10.97    | 103.16  |
| CAA  | 3   | 802.30         | 2.55     | 92.84   |
| CAA  | 3.5 | 910.40         | 2.74     | 105.35  |
| BAA  | 1   | 10234.00       | 9.68     | 100.00  |
| BAA  | 1.5 | 9796.31        | 8.50     | 95.72   |
| BAA  | 2   | 10024.60       | 5.89     | 97.95   |
| BAA  | 2.5 | 12546.88       | 11.90    | 122.60  |
| BAA  | 3   | 12997.18       | 9.46     | 127.00  |
| BAA  | 3.5 | 13191.63       | 7.73     | 128.90  |
| DCAA | 1   | 8561.65        | 7.44     | 100.00  |
| DCAA | 1.5 | 9658.70        | 3.70     | 112.81  |
| DCAA | 2   | 12279.60       | 5.23     | 143.43  |
| DCAA | 2.5 | 13998.30       | 9.85     | 163.50  |
| DCAA | 3   | 15213.20       | 12.75    | 177.69  |
| DCAA | 3.5 | 15649.84       | 4.96     | 182.79  |
| TCAA | 1   | 24824.70       | 6.34     | 100.00  |
| TCAA | 1.5 | 28327.00       | 11.50    | 114.11  |
| TCAA | 2   | 36465.40       | 11.94    | 146.89  |
| TCAA | 2.5 | 60671.57       | 5.60     | 244.40  |
| TCAA | 3   | 70477.32       | 4.75     | 283.90  |
| TCAA | 3.5 | 75988.41       | 6.39     | 306.10  |
| BCAA | 1   | 28942.50       | 3.42     | 100.00  |
| BCAA | 1.5 | 28917.06       | 3.29     | 99.91   |
| BCAA | 2   | 31277.11       | 11.14    | 108.07  |

|       |     |          |       |        |
|-------|-----|----------|-------|--------|
| BCAA  | 2.5 | 41803.21 | 5.78  | 144.44 |
| BCAA  | 3   | 49195.21 | 5.45  | 169.98 |
| BCAA  | 3.5 | 53994.74 | 3.41  | 186.56 |
| IAA   | 1   | 24121.10 | 7.15  | 100.00 |
| IAA   | 1.5 | 25133.62 | 12.88 | 104.20 |
| IAA   | 2   | 34387.18 | 6.67  | 142.56 |
| IAA   | 2.5 | 45371.17 | 11.06 | 188.10 |
| IAA   | 3   | 55005.36 | 12.93 | 228.04 |
| IAA   | 3.5 | 62506.09 | 2.93  | 259.13 |
| DCBAA | 1   | 3717.02  | 2.95  | 100.00 |
| DCBAA | 1.5 | 4903.27  | 7.72  | 131.91 |
| DCBAA | 2   | 5557.26  | 10.74 | 149.51 |
| DCBAA | 2.5 | 15054.30 | 9.79  | 405.01 |
| DCBAA | 3   | 16499.85 | 11.68 | 443.90 |
| DCBAA | 3.5 | 16899.80 | 8.36  | 454.66 |
| DBAA  | 1   | 28594.90 | 8.69  | 100.00 |
| DBAA  | 1.5 | 30810.70 | 11.82 | 107.75 |
| DBAA  | 2   | 40640.90 | 5.20  | 142.13 |
| DBAA  | 2.5 | 60170.60 | 12.80 | 210.42 |
| DBAA  | 3   | 68999.49 | 7.16  | 241.30 |
| DBAA  | 3.5 | 69997.46 | 7.58  | 244.79 |

---

**Table S4: Effect of derivatization time on the response strength of HAAs. The concentration of HAAs was 20 µg/L (mean ± SD, n = 3)**

| HAA  | time(h) | area(mean,n=3) | area(sd) | area(%) |
|------|---------|----------------|----------|---------|
| CAA  | 0       | 575.63         | 3.25     | 87.81   |
| CAA  | 0.5     | 619.84         | 2.38     | 94.55   |
| CAA  | 1       | 624.12         | 4.54     | 95.20   |
| CAA  | 1.5     | 637.73         | 8.46     | 97.28   |
| CAA  | 2       | 655.56         | 9.56     | 100.00  |
| CAA  | 2.5     | 653.28         | 7.12     | 99.65   |
| BAA  | 0       | 5956.31        | 5.30     | 101.85  |
| BAA  | 0.5     | 5786.77        | 5.58     | 98.95   |
| BAA  | 1       | 5641.20        | 9.76     | 96.46   |
| BAA  | 1.5     | 5794.46        | 2.38     | 99.08   |
| BAA  | 2       | 5848.06        | 5.62     | 100.00  |
| BAA  | 2.5     | 5867.70        | 2.65     | 100.34  |
| DCAA | 0       | 3968.14        | 4.46     | 97.00   |
| DCAA | 0.5     | 3977.00        | 5.63     | 97.22   |
| DCAA | 1       | 3967.53        | 6.30     | 96.99   |
| DCAA | 1.5     | 4051.34        | 8.03     | 99.03   |
| DCAA | 2       | 4090.83        | 8.96     | 100.00  |
| DCAA | 2.5     | 4088.06        | 2.70     | 99.93   |
| TCAA | 0       | 15135.68       | 11.89    | 96.73   |
| TCAA | 0.5     | 15416.47       | 4.83     | 98.53   |
| TCAA | 1       | 15257.21       | 11.86    | 97.51   |
| TCAA | 1.5     | 15239.46       | 6.74     | 97.39   |
| TCAA | 2       | 15647.10       | 4.90     | 100.00  |
| TCAA | 2.5     | 15586.76       | 2.04     | 99.61   |
| BCAA | 0       | 10274.63       | 3.63     | 70.53   |
| BCAA | 0.5     | 13609.68       | 9.60     | 93.42   |
| BCAA | 1       | 14050.09       | 10.31    | 96.44   |



|       |     |          |       |        |
|-------|-----|----------|-------|--------|
| BCAA  | 1.5 | 14198.58 | 8.47  | 97.46  |
| BCAA  | 2   | 14568.00 | 10.90 | 100.00 |
| BCAA  | 2.5 | 14646.79 | 9.85  | 100.54 |
| IAA   | 0   | 7121.51  | 8.63  | 56.62  |
| IAA   | 0.5 | 12247.73 | 10.31 | 97.37  |
| IAA   | 1   | 12142.01 | 8.89  | 96.53  |
| IAA   | 1.5 | 12365.19 | 9.46  | 98.30  |
| IAA   | 2   | 12578.60 | 10.61 | 100.00 |
| IAA   | 2.5 | 12541.70 | 5.71  | 99.71  |
| DCBAA | 0   | 2061.39  | 4.27  | 67.86  |
| DCBAA | 0.5 | 2695.92  | 5.28  | 88.74  |
| DCBAA | 1   | 2743.27  | 8.75  | 90.30  |
| DCBAA | 1.5 | 2759.61  | 5.49  | 90.84  |
| DCBAA | 2   | 3037.87  | 7.63  | 100.00 |
| DCBAA | 2.5 | 3074.23  | 6.02  | 101.20 |
| DBAA  | 0   | 15193.70 | 10.69 | 80.54  |
| DBAA  | 0.5 | 18138.69 | 2.48  | 96.15  |
| DBAA  | 1   | 18276.91 | 3.63  | 96.89  |
| DBAA  | 1.5 | 18303.02 | 2.70  | 97.02  |
| DBAA  | 2   | 18864.30 | 2.57  | 100.00 |
| DBAA  | 2.5 | 18880.45 | 7.25  | 100.09 |

---

**Table S5: Effect of sodium sulfate solution added on the response strength of HAAs. The concentration of HAAs was 20 µg/L (mean ± SD, n = 3)**

| HAA  | sodium sulfate solution(mL) | area(mean,n=3) | sd    | area(%) |
|------|-----------------------------|----------------|-------|---------|
| CAA  | 6                           | 946.35         | 4.06  | 100.00  |
| CAA  | 7                           | 943.58         | 6.90  | 99.71   |
| CAA  | 8                           | 887.92         | 3.90  | 93.83   |
| CAA  | 9                           | 837.86         | 7.90  | 88.54   |
| CAA  | 10                          | 851.87         | 9.29  | 90.02   |
| BAA  | 6                           | 9870.53        | 5.02  | 100.00  |
| BAA  | 7                           | 9810.84        | 9.61  | 99.40   |
| BAA  | 8                           | 9750.81        | 2.79  | 98.79   |
| BAA  | 9                           | 9716.73        | 4.15  | 98.44   |
| BAA  | 10                          | 9645.17        | 5.23  | 97.72   |
| DCAA | 6                           | 9037.51        | 8.99  | 100.00  |
| DCAA | 7                           | 9033.09        | 4.25  | 99.95   |
| DCAA | 8                           | 8649.26        | 4.85  | 95.70   |
| DCAA | 9                           | 8637.17        | 11.48 | 95.57   |
| DCAA | 10                          | 8494.76        | 6.49  | 93.99   |
| TCAA | 6                           | 25884.90       | 8.30  | 100.00  |
| TCAA | 7                           | 25810.61       | 9.32  | 99.71   |
| TCAA | 8                           | 25747.00       | 3.28  | 99.47   |
| TCAA | 9                           | 25053.19       | 2.80  | 96.79   |
| TCAA | 10                          | 24535.38       | 10.41 | 94.79   |
| BCAA | 6                           | 34270.40       | 8.28  | 100.00  |
| BCAA | 7                           | 34039.96       | 8.74  | 99.33   |
| BCAA | 8                           | 32038.71       | 11.57 | 93.49   |
| BCAA | 9                           | 29950.54       | 9.89  | 87.39   |
| BCAA | 10                          | 27440.44       | 7.55  | 80.07   |
| IAA  | 6                           | 23604.40       | 9.79  | 100.00  |
| IAA  | 7                           | 23244.18       | 4.60  | 98.47   |

|       |    |          |       |        |
|-------|----|----------|-------|--------|
| IAA   | 8  | 23162.35 | 8.83  | 98.13  |
| IAA   | 9  | 23032.36 | 3.62  | 97.58  |
| IAA   | 10 | 21864.76 | 6.50  | 92.63  |
| DCBAA | 6  | 3872.54  | 6.99  | 100.00 |
| DCBAA | 7  | 3452.88  | 9.55  | 89.16  |
| DCBAA | 8  | 3288.51  | 6.59  | 84.92  |
| DCBAA | 9  | 3098.35  | 9.50  | 80.01  |
| DCBAA | 10 | 2801.00  | 10.80 | 72.33  |
| DBAA  | 6  | 30454.20 | 5.27  | 100.00 |
| DBAA  | 7  | 30793.95 | 9.07  | 101.12 |
| DBAA  | 8  | 28216.92 | 2.15  | 92.65  |
| DBAA  | 9  | 27650.16 | 11.19 | 90.79  |
| DBAA  | 10 | 26631.63 | 5.11  | 87.45  |

**Table S6: Effect of the influence of sodium sulfate solution volume and A/M on the volume of MTBE recovered. The concentration of HAAs was 20 µg/L (mean ± SD, n = 3)**

| A/M | sodium sulfate solution(mL) | MTBE volumn (estimated value) |
|-----|-----------------------------|-------------------------------|
| 1   | 5                           | 1900                          |
| 1   | 6                           | 1900                          |
| 1   | 7                           | 1850                          |
| 1   | 8                           | 1870                          |
| 1   | 9                           | 1900                          |
| 1   | 10                          | 1800                          |
| 1.5 | 5                           | 1500                          |
| 1.5 | 6                           | 1600                          |
| 1.5 | 7                           | 1650                          |
| 1.5 | 8                           | 1660                          |
| 1.5 | 9                           | 1660                          |

|     |    |      |
|-----|----|------|
| 1.5 | 10 | 1670 |
| 2   | 5  | 700  |
| 2   | 6  | 1050 |
| 2   | 7  | 1020 |
| 2   | 8  | 1000 |
| 2   | 9  | 1050 |
| 2   | 10 | 1000 |
| 2.5 | 5  | 200  |
| 2.5 | 6  | 450  |
| 2.5 | 7  | 800  |
| 2.5 | 8  | 830  |
| 2.5 | 9  | 850  |
| 2.5 | 10 | 860  |
| 3   | 5  | 0    |
| 3   | 6  | 0    |
| 3   | 7  | 0    |
| 3   | 8  | 250  |
| 3   | 9  | 350  |
| 3   | 10 | 380  |
| 3.5 | 5  | 0    |
| 3.5 | 6  | 0    |
| 3.5 | 7  | 0    |
| 3.5 | 8  | 0    |
| 3.5 | 9  | 200  |
| 3.5 | 10 | 350  |

---

**Table S7 Concentrations of HAAs (µg/L) in urine samples (N=460)**

| Chemicals | Detection frequency (%) | Concentrations (µg/L) |                 |                 |                 |       |                 |
|-----------|-------------------------|-----------------------|-----------------|-----------------|-----------------|-------|-----------------|
|           |                         | Min                   | P <sub>25</sub> | P <sub>50</sub> | P <sub>75</sub> | Max   | GM <sup>a</sup> |
| CAA       | 94.7                    | <MDL <sup>b</sup>     | 0.49            | 0.61            | 0.76            | 14.95 | 0.59            |
| DCAA      | 85.7                    | <MDL                  | 0.09            | 0.49            | 0.90            | 22.45 | 0.30            |
| TCAA      | 99.3                    | <MDL                  | 0.48            | 0.86            | 1.59            | 42.31 | 0.89            |
| IAA       | 91.6                    | <MDL                  | 0.04            | 0.07            | 0.11            | 6.20  | 0.07            |
| BCAA      | 4.2                     | <MDL                  | <MDL            | <MDL            | <MDL            | 5.31  | \ <sup>c</sup>  |
| DBAA      | 95.8                    | <MDL                  | 0.41            | 0.45            | 0.53            | 15.28 | 0.43            |
| ΣHAAs     |                         | 0.57                  | 2.02            | 2.67            | 4.30            | 43.33 | 3.09            |

<sup>a</sup>: GM represents the geometric mean of each target analyte.

<sup>b</sup>: Below the method, the detection limit was defined as not detected and was not included in the calculation of the detection frequency. Values below the method detection limit were used in the statistical calculation at 1/2 the detection limit.

<sup>c</sup>: The detection frequency was lower than 50%, and GM was not calculated.
